# Supplementary material for: Germanium-based superatom clusters as excess electron compounds with significant static and dynamic NLO response; a DFT study
Source: PubMed Central journal article supplement (PMC8978613; doi:10.1039/d1ra08192f), 2021-12-21
Supplement: RA-012-D1RA08192F-s001.pdf [file RA-012-D1RA08192F-s001.pdf]

## Electronic Supplementary information (ESI)

### **Germanium-based superatom clusters as excess electron compounds with significant static and dynamic NLO response; A DFT Study**

Atazaz Ahsin, Ahmed Bilal Shah, Khurshid Ayub\*

Department of Chemistry, COMSATS University Islamabad, Abbottabad Campus,  
Abbottabad, KPK, 22060, Pakistan

Correspondence:

[khurshid@cuiatd.edu.pk](mailto:khurshid@cuiatd.edu.pk) (K. A.)

### 1. Optimized geometric analysis

The obtained geometric parameters of these clusters are given in Table 1 (ESI). The obtained point group symmetry of  $\text{Ge}_5\text{AM}_3$ ,  $\text{Ge}_9\text{AM}_5$  and  $\text{Ge}_{10}\text{AM}_3$  (where AM = Li, Na, K) are  $C_S$ ,  $C_{4V}$ , and  $C_2$  respectively. The calculated equilibrium bond length ( $X_{\text{Ge-Ge}}$ ) in the  $\text{Ge}_5\text{AM}_3$  series are lie in the range of 2.53 to 2.54 Å. Similarly, the obtained values of  $X_{\text{Ge-Ge}}$  bond length in the  $\text{Ge}_9\text{AM}_5$  series are slightly enhanced and lie in the range of 2.57 to 2.68 Å. However, the calculated average values of  $X_{\text{Ge-Ge}}$  bond lengths between germanium atoms in  $\text{Ge}_{10}\text{AM}_3$  clusters are further increased. Thus the observed trend average computed bond length (Ge-Ge) within the clusters series is  $\text{Ge}_5\text{AM}_3 < \text{Ge}_9\text{AM}_5 < \text{Ge}_{10}\text{AM}_3$ . One can also conclude that, with the increased cluster size, there is a gradual enhancement in bond distance between the germanium atom from  $\text{Ge}_5$  to  $\text{Ge}_9$  and then to  $\text{Ge}_{10}$ .

Furthermore, the computed average bond lengths ( $X_{\text{Ge-AM}}$ ) for  $\text{Ge}_5\text{AM}_3$  clusters lie in the range of 2.51 to 3.34 Å. In the series ( $\text{Ge}_5\text{AM}_3$ ), the observed bond length increases monotonically with increased metal sized. Thus highest computed bond length  $X_{\text{Ge-AM}}$  (where AM = Li, Na, K) value of 3.34 Å is observed for the  $\text{Ge}_5\text{K}_3$  cluster while the lowest of 2.51 Å is indicated for the  $\text{Ge}_5\text{Li}_3$  cluster. Similarly, the calculated value of ( $X_{\text{Ge-AM}}$ ) bond lengths for the of zintl  $\text{Ge}_9\text{AM}_5$  lie in the rage of 2.57 to 3.33 Å. The highest obtained value of 3.33 Å for  $\text{Ge}_9\text{K}_5$  is attributed to large sized alkali metal.

**Table S1:** Point group symmetry, average computed  $X_{\text{Ge-Ge}}$  bond length (in Å), average computed  $X_{\text{Ge-AM}}$  bond lengths (in Å where AM=Li, Na, K), binding energy per atom ( $E_B$  in kcal mol<sup>-1</sup>), and total energy ( $E_{\text{tot}}$  in hartree) of studied superalkali clusters.

| <b>Ge<sub>5</sub>AM<sub>3</sub></b> |                 |                          |                          |                        |
|-------------------------------------|-----------------|--------------------------|--------------------------|------------------------|
| <b>Superalkalis</b>                 | <b>Symmetry</b> | <b>X<sub>Ge-Ge</sub></b> | <b>X<sub>Ge-AM</sub></b> | <b>E<sub>tot</sub></b> |
| Ge <sub>5</sub> Li <sub>3</sub> (A) | $C_S$           | 2.56                     | 2.51                     | 10408.09               |
| Ge <sub>5</sub> Na <sub>3</sub> (B) | $C_S$           | 2.53                     | 2.84                     | 10872.40               |
| Ge <sub>5</sub> K <sub>3</sub> (C)  | $C_S$           | 2.52                     | 3.34                     | 12185.41               |
| <b>Ge<sub>9</sub>AM<sub>5</sub></b> |                 |                          |                          |                        |
| Ge <sub>9</sub> Li <sub>5</sub> (D) | $C_{4V}$        | 2.57                     | 2.57                     | 18731.62               |
| Ge <sub>9</sub> Na <sub>5</sub> (E) | $C_{4V}$        | 2.66                     | 3.01                     | 19505.47               |
| Ge <sub>9</sub> K <sub>5</sub> (F)  | $C_{4V}$        | 2.68                     | 3.33                     | 21693.84               |

| <b>Ge<sub>10</sub>AM<sub>3</sub></b> |                |      |      |          |
|--------------------------------------|----------------|------|------|----------|
| Ge <sub>10</sub> Li <sub>3</sub> (G) | C <sub>2</sub> | 2.84 | 2.56 | 20793.65 |
| Ge <sub>10</sub> Na <sub>3</sub> (H) | C <sub>2</sub> | 2.65 | 2.94 | 21257.97 |
| Ge <sub>10</sub> K <sub>3</sub> (I)  | C <sub>2</sub> | 2.73 | 3.24 | 22571.01 |

## 2. Optimized geometric coordinates at CAM-B3LYP/6-311+G(d,p)

The optimized geometries and their cartesian coordinates at above functional are given in Table 2.

**Table S2:** Optimized geometric coordinates of Ge<sub>5</sub>AM<sub>3</sub>, Ge<sub>9</sub>AM<sub>5</sub>, Ge<sub>10</sub>AM<sub>3</sub> clusters

### Ge<sub>5</sub>AM<sub>3</sub> (where AM=Li, Na K)

A

|   |    |   |           |           |           |
|---|----|---|-----------|-----------|-----------|
| 1 | 32 | 0 | -1.884226 | 0.850537  | 0.000000  |
| 2 | 32 | 0 | -0.389141 | -0.677590 | 1.349466  |
| 3 | 32 | 0 | -0.389141 | -0.677590 | -1.349466 |
| 4 | 32 | 0 | 0.840445  | 1.340237  | 0.000000  |
| 5 | 32 | 0 | 1.891553  | -0.894711 | 0.000000  |
| 6 | 3  | 0 | 0.037077  | -2.981132 | 0.000000  |
| 7 | 3  | 0 | -0.389141 | 1.805857  | 2.325246  |
| 8 | 3  | 0 | -0.389141 | 1.805857  | -2.325246 |

B

|   |    |   |           |           |           |
|---|----|---|-----------|-----------|-----------|
| 1 | 32 | 0 | -2.124191 | 0.843194  | 0.000000  |
| 2 | 32 | 0 | -0.274994 | -0.225238 | 1.380866  |
| 3 | 32 | 0 | -0.274994 | -0.225238 | -1.380866 |
| 4 | 32 | 0 | 1.554371  | 0.977147  | 0.000000  |
| 5 | 32 | 0 | 1.317566  | -1.618584 | 0.000000  |
| 6 | 11 | 0 | -0.274994 | 2.394316  | 1.429215  |
| 7 | 11 | 0 | -1.559439 | -1.904018 | 0.000000  |
| 8 | 11 | 0 | -0.274994 | 2.394316  | -1.429215 |

C

|   |    |   |           |           |           |
|---|----|---|-----------|-----------|-----------|
| 1 | 32 | 0 | -2.053163 | 0.690772  | 0.000000  |
| 2 | 32 | 0 | -0.176512 | -0.343358 | 1.363159  |
| 3 | 32 | 0 | -0.176512 | -0.343358 | -1.363159 |
| 4 | 32 | 0 | 1.676226  | 0.862787  | 0.000000  |
| 5 | 32 | 0 | 1.428969  | -1.735165 | 0.000000  |
| 6 | 19 | 0 | -1.680455 | -2.387954 | 0.000000  |
| 7 | 19 | 0 | -0.176512 | 2.456993  | 1.732894  |

|   |    |   |           |          |           |
|---|----|---|-----------|----------|-----------|
| 8 | 19 | 0 | -0.176512 | 2.456993 | -1.732894 |
|---|----|---|-----------|----------|-----------|

---

Ge<sub>9</sub>AM<sub>5</sub>

---

D

|    |    |   |           |           |           |
|----|----|---|-----------|-----------|-----------|
| 1  | 32 | 0 | 1.877671  | 0.000000  | -1.399972 |
| 2  | 32 | 0 | -1.410469 | 1.410469  | 0.807043  |
| 3  | 32 | 0 | -1.877671 | 0.000000  | -1.399972 |
| 4  | 32 | 0 | 0.000000  | -1.877671 | -1.399972 |
| 5  | 32 | 0 | 0.000000  | 1.877671  | -1.399972 |
| 6  | 32 | 0 | 0.000000  | 0.000000  | 2.533846  |
| 7  | 32 | 0 | 1.410469  | -1.410469 | 0.807043  |
| 8  | 32 | 0 | -1.410469 | -1.410469 | 0.807043  |
| 9  | 32 | 0 | 1.410469  | 1.410469  | 0.807043  |
| 10 | 3  | 0 | 0.000000  | 3.762213  | 0.394238  |
| 11 | 3  | 0 | 0.000000  | 0.000000  | -3.306325 |
| 12 | 3  | 0 | 3.762213  | 0.000000  | 0.394238  |
| 13 | 3  | 0 | -3.762213 | 0.000000  | 0.394238  |
| 14 | 3  | 0 | 0.000000  | -3.762213 | 0.394238  |

E

|    |    |   |           |           |           |
|----|----|---|-----------|-----------|-----------|
| 1  | 32 | 0 | -0.000044 | -1.296794 | 1.891368  |
| 2  | 32 | 0 | 1.594194  | 0.819133  | -1.285309 |
| 3  | 32 | 0 | -0.000037 | -1.299661 | -1.889546 |
| 4  | 32 | 0 | -1.801465 | -1.497280 | 0.000983  |
| 5  | 32 | 0 | 1.801365  | -1.497385 | 0.000990  |
| 6  | 32 | 0 | 0.000070  | 2.439021  | -0.001499 |
| 7  | 32 | 0 | -1.594464 | 0.821109  | 1.284116  |
| 8  | 32 | 0 | -1.594127 | 0.819221  | -1.285318 |
| 9  | 32 | 0 | 1.594512  | 0.821022  | 1.284119  |
| 10 | 11 | 0 | 3.874235  | 0.104991  | 0.000071  |
| 11 | 11 | 0 | 0.000040  | 0.873018  | -3.285682 |
| 12 | 11 | 0 | 0.000022  | 0.877962  | 3.284110  |
| 13 | 11 | 0 | -3.874220 | 0.105245  | 0.000031  |
| 14 | 11 | 0 | -0.000097 | -3.204240 | 0.002418  |

F

|   |    |   |           |           |           |
|---|----|---|-----------|-----------|-----------|
| 1 | 32 | 0 | -0.000023 | 1.797508  | 1.341929  |
| 2 | 32 | 0 | 1.428077  | -1.390586 | -0.836325 |
| 3 | 32 | 0 | -0.000090 | -1.798469 | 1.338650  |
| 4 | 32 | 0 | -1.904868 | -0.001538 | 1.363939  |
| 5 | 32 | 0 | 1.904707  | -0.001564 | 1.364082  |
| 6 | 32 | 0 | 0.000090  | 0.002559  | -2.523112 |
| 7 | 32 | 0 | -1.427761 | 1.391643  | -0.832651 |
| 8 | 32 | 0 | -1.428051 | -1.390481 | -0.836404 |

|    |    |   |           |           |           |
|----|----|---|-----------|-----------|-----------|
| 9  | 32 | 0 | 1.427892  | 1.391549  | -0.832578 |
| 10 | 19 | 0 | 4.466674  | 0.001246  | -0.919075 |
| 11 | 19 | 0 | 0.000220  | 4.436661  | -0.733006 |
| 12 | 19 | 0 | -4.466471 | 0.001591  | -0.919423 |
| 13 | 19 | 0 | -0.000152 | -4.437295 | -0.735491 |
| 14 | 19 | 0 | -0.000225 | -0.003250 | 4.069048  |

---

$\text{Ge}_0\text{AM}_3$

---

G

|    |    |   |           |           |           |
|----|----|---|-----------|-----------|-----------|
| 1  | 32 | 0 | 2.142890  | 0.133790  | -0.775192 |
| 2  | 32 | 0 | -0.881017 | -1.887825 | 0.770452  |
| 3  | 32 | 0 | -2.142890 | -0.133790 | -0.775192 |
| 4  | 32 | 0 | 0.000000  | 1.288547  | -1.861020 |
| 5  | 32 | 0 | 0.000000  | -1.288547 | -1.861020 |
| 6  | 32 | 0 | -1.256068 | 0.453309  | 1.817801  |
| 7  | 32 | 0 | 0.881017  | 1.887825  | 0.770452  |
| 8  | 32 | 0 | -1.613176 | 2.366289  | -0.009281 |
| 9  | 32 | 0 | 1.256068  | -0.453309 | 1.817801  |
| 10 | 32 | 0 | 1.613176  | -2.366289 | -0.009281 |
| 11 | 3  | 0 | 0.000000  | 0.000000  | 4.104612  |
| 12 | 3  | 0 | -2.267041 | -2.716739 | -1.441740 |
| 13 | 3  | 0 | 2.267041  | 2.716739  | -1.441740 |

H

|    |    |   |           |           |           |
|----|----|---|-----------|-----------|-----------|
| 1  | 32 | 0 | 2.216692  | 0.563433  | -0.580820 |
| 2  | 32 | 0 | -0.430143 | -1.998719 | 0.767084  |
| 3  | 32 | 0 | -2.216692 | -0.563433 | -0.580820 |
| 4  | 32 | 0 | 0.000000  | 1.261030  | -1.856468 |
| 5  | 32 | 0 | 0.000000  | -1.261030 | -1.856468 |
| 6  | 32 | 0 | -1.312450 | 0.272097  | 1.758832  |
| 7  | 32 | 0 | 0.430143  | 1.998719  | 0.767084  |
| 8  | 32 | 0 | -1.980202 | 1.965648  | -0.333863 |
| 9  | 32 | 0 | 1.312450  | -0.272097 | 1.758832  |
| 10 | 32 | 0 | 1.980202  | -1.965648 | -0.333863 |
| 11 | 11 | 0 | -1.858055 | -3.072946 | -1.242730 |
| 12 | 11 | 0 | 0.000000  | 0.000000  | 3.912281  |
| 13 | 11 | 0 | 1.858055  | 3.072946  | -1.242730 |

---

I

|   |    |   |           |           |           |
|---|----|---|-----------|-----------|-----------|
| 1 | 32 | 0 | 2.142890  | 0.133790  | -0.775192 |
| 2 | 32 | 0 | -0.881017 | -1.887825 | 0.770452  |
| 3 | 32 | 0 | -2.142890 | -0.133790 | -0.775192 |
| 4 | 32 | 0 | 0.000000  | 1.288547  | -1.861020 |
| 5 | 32 | 0 | 0.000000  | -1.288547 | -1.861020 |
| 6 | 32 | 0 | -1.256068 | 0.453309  | 1.817801  |

|    |    |   |           |           |           |
|----|----|---|-----------|-----------|-----------|
| 7  | 32 | 0 | 0.881017  | 1.887825  | 0.770452  |
| 8  | 32 | 0 | -1.613176 | 2.366289  | -0.009281 |
| 9  | 32 | 0 | 1.256068  | -0.453309 | 1.817801  |
| 10 | 32 | 0 | 1.613176  | -2.366289 | -0.009281 |
| 11 | 19 | 0 | -2.267041 | -2.716739 | -1.441740 |
| 12 | 19 | 0 | 2.267041  | 2.716739  | -1.441740 |
| 13 | 19 | 0 | 0.000000  | 0.000000  | 4.104612  |

---
